# Supplementary material for: Anxiety and depression with neurogenesis defects in exchange protein directly activated by cAMP 2-deficient mice are ameliorated by a selective serotonin reuptake inhibitor, Prozac
Source: PubMed Central journal article supplement (PMC5048194; doi:10.1038/tp.2016.129), 2016-09-06
Supplement: tp2016129x2.pdf [file tp2016129x2.pdf]

## Supplementary Figure 1

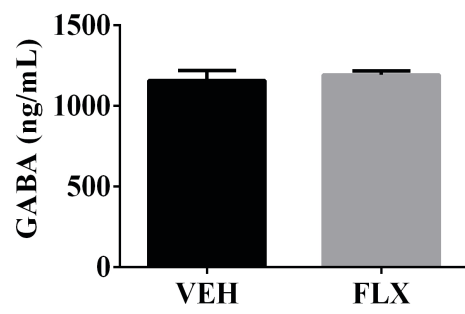

LC-MS/MS measurement of GABA in the hippocampus of vehicle- and fluoxetine-treated Epac2<sup>-/-</sup> mice. Hippocampi were dissected, homogenized and GABA ( $\gamma$ -aminobutyric acid) was measured by HPLC-MS/MS. No significant difference was detected by unpaired t test. (N=5-6 per group)

## Supplementary Figure 2

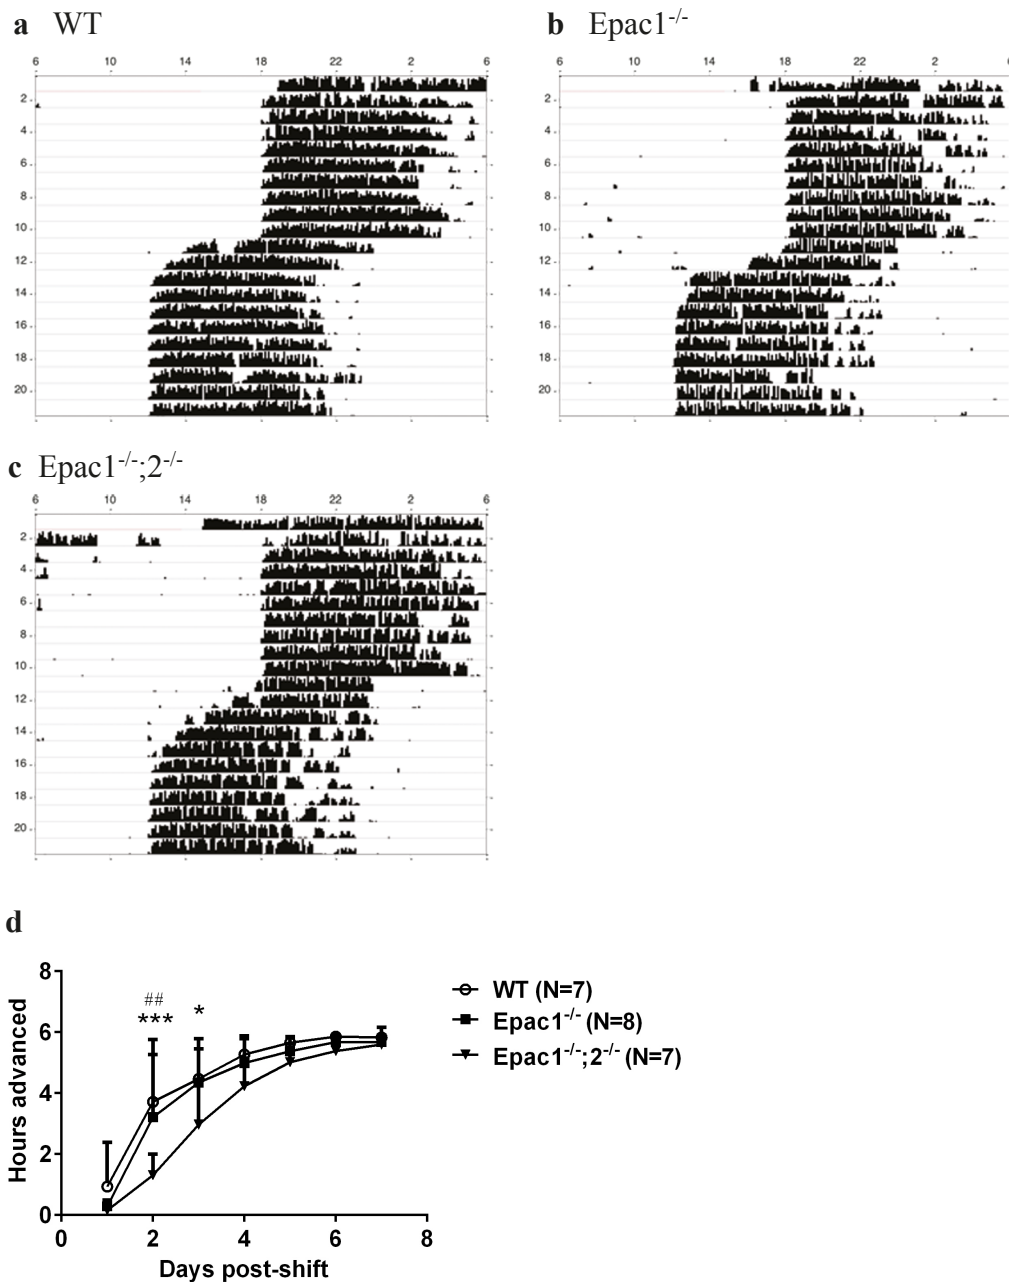

Wheel running activity showing the circadian rhythm of WT, Epac1<sup>-/-</sup> and Epac1<sup>-/-</sup>;2<sup>-/-</sup> mice under the light dark cycle shift experiment. In the representative actograms (a-c), each horizontal line indicated one day. Black vertical bars plotted side-by-side represented the activity of the mice, indicated by the number of wheel revolutions in this experiment. The light dark cycle was shift from 18:00-06:00 to 12:00-24:00 on day 11. Synchronization of the internal circadian clock to the environment light-dark signal (re-entrainment) happened several days later. (d) Advance of activity onset after light dark cycle shift was plotted in marked lines (\*P<0.05 and \*\*\*P<0.001 showing difference between WT and Epac1<sup>-/-</sup>;2<sup>-/-</sup> mice; ##P<0.01 showing difference between Epac1<sup>-/-</sup> and Epac1<sup>-/-</sup>;2<sup>-/-</sup> mice by Tukey's multiple comparison test. N=7-8).

### Supplementary Figure 3

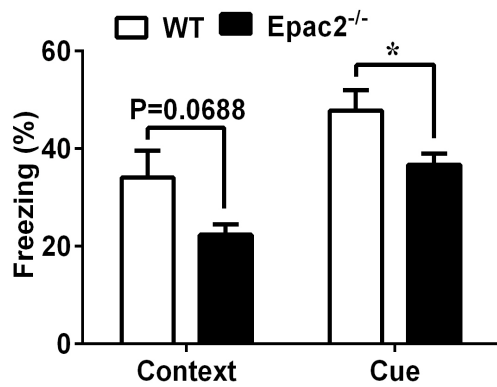

Epac2<sup>-/-</sup> mice showed moderately impaired cued and contextual fear memory one week after training. Percentages of the freezing behavior were again determined during contextual/cued tests 7/8 days after training, respectively (P=0.0688 for contextual test and P<0.05 for cued test between WT and Epac2<sup>-/-</sup> mice by unpaired T-test. N=8-9).
